# Supplementary material for: Human germline heterozygous gain-of-function STAT6 variants cause severe allergic disease
Source: PubMed Central journal article supplement (PMC10037107; doi:10.1084/jem.20221755), 2023-03-08
Supplement: JEM_20221755_DataS1.pdf [file JEM_20221755_DataS1.pdf]

## 1 CLINICAL NARRATIVES

### 2 Patient 1

3 Patient 1 (P1) is a female who had short stature (**Fig 7**) and life-long struggles with severe  
4 allergic disease. The patient was born to non-consanguineous parents of Middle Eastern  
5 descent and she has three younger healthy brothers. Multiple family members report food  
6 sensitivity and her father died of lung cancer at age 55 years. She presented with severe  
7 chronic, treatment-resistant atopic dermatitis since birth. She was diagnosed with IgE mediated  
8 food allergy to egg, milk, peanut and tree nuts during the first 2 years of her life. She was  
9 diagnosed with asthma as an infant. At age 1 year she had a pneumothorax requiring chest  
10 tube insertion, and at age 2 years required intubation for an asthma exacerbation. At age 4  
11 years she was diagnosed with giant papillary conjunctivitis which has remained an ongoing  
12 challenge. Other eye manifestations included unilateral retinal detachment at age 16 years and  
13 the development of cataracts requiring surgery at age 23 years. Through her second and third  
14 decades of life she continued to suffer from eczema, asthma, recurrent bronchitis, rhino  
15 conjunctivitis, and secondary staphylococcal and candida skin infections. She had multiple  
16 dental abscess in the second and third decades of her life. In her 20s she began experiencing  
17 gastrointestinal symptoms culminating in biopsy diagnosed eosinophilic esophagitis and  
18 eosinophilic gastroenteritis. Serial blood testing over the years confirmed eosinophilia and high  
19 serum IgE levels. Brain MRI at age 35 years revealed multiple anatomical variants including  
20 anomalous vasculature in the circle of Willis with hypoplastic vertebrobasilar arteries, a  
21 persistent left-sided congenital trigeminal artery with tortuosity, and a hypoplastic A1 segment of  
22 the right anterior carotid artery. Multiple therapies were trialed over the years with  
23 corticosteroids offering the most obvious benefits. At age 34 years she started dupilumab and  
24 after 3 months she began to experience benefit. With continued treatment, her skin improved  
25 dramatically (Eczema Area and Severity Index (EASI) score fell from 65 (very severe) to 3.5  
26 (mild)), she was able to wean off oral corticosteroids (required 20mg/day prednisone before  
27 dupilumab), and she was able to discontinue daily antihistamine which was used for pruritus. To  
28 seek a diagnosis for this spectrum of severe allergic manifestations, whole exome sequencing  
29 (WES) was performed on the patient, her mother and one of her brothers and a de novo  
30 heterozygous variant for *STAT6* (NM\_001178079.2) at c.1256A>G, p.D419G was identified.



36 **Patient 2**

37 Patient 2 (P2) is a 16-year-old female who has had struggles with severe atopic disease,  
38 recurrent infection, and gastrointestinal disease from a very young age. P2 also has a growth  
39 chart that is consistent with her short stature (**Fig 8**). She was born to non-consanguineous  
40 parents of Hispanic decent. She has no full siblings, but does have 4 paternal half siblings and  
41 one maternal half-sibling. Her father and 2 paternal half-siblings have asthma; one paternal half  
42 sibling has eczema. She presented with severe reflux leading to hospitalization within the first  
43 month of life and was diagnosed with pyloric stenosis at that time. At the same age she was first  
44 noted to have atopic dermatitis, as well as concern for IgE-mediated food allergy. At 5 months of  
45 age she had anaphylaxis, presumed to be from egg in breastmilk. Radioallergosorbent (RAST)  
46 testing at the time demonstrated the presence of IgE-against milk, egg, rice, turkey, wheat, soy,  
47 and peanut. Due to her multiple food allergies she was nutritionally supported with  
48 hypoallergenic amino acid-based formula. She was diagnosed with eosinophilic esophagitis at 3  
49 years of age with histological evidence of eosinophils in the esophagus (25 eosinophils per high  
50 powered field (HPF)) and increased lamina propria of the stomach.

51 Her atopic dermatitis, present since the 1<sup>st</sup> month of life, was frequently associated with  
52 bacterial superinfection-driven flares of disease. Management of her eczema with mid-high  
53 potency topical steroids and topical antimicrobials initially provided some improvement.  
54 However, her atopic dermatitis worsened with age and became less responsive to topical  
55 therapies. At 10 years of age, methotrexate was added but was not tolerated due to  
56 gastrointestinal side-effects. At 13 years of age she was started on dupilumab therapy, which  
57 was associated with decreased symptoms, particularly her itchiness and over the subsequent  
58 following years, reduction in her cutaneous bacterial infections. Specifically, her Investigator's  
59 Global Assessment Scale (IGA) fell from 4/4 (severe) to 1/4 (almost clear). Dupilumab therapy  
60 was also associated with an ability to discontinue swallowed budesonide with continued control  
61 of her eosinophilic esophagitis to 5-10 eosinophils per HPF within a year of initiation of this  
62 biologic.

63 By 2 years of life she was diagnosed with asthma, which was managed with inhaled  
64 corticosteroids and monteleukast. However, she had recurrent flares associated with underlying  
65 infections, and innumerable hospitalizations in the first 12 years of life.

66 With regard to infection, she had 5 episodes of hospitalization for pneumonia/bronchitis in the  
67 first year of life, with 2 episodes requiring intubation and mechanical ventilation. She has had  
68 multiple episodes of cutaneous abscesses, including perianal boils. At 8 years she developed  
69 challenges with recurrent HSV with ocular involvement and she has been sporadically treated  
70 for non-disseminated flat warts. Given the severity of the disease, WES was conducted and a  
71 *de novo* heterozygous variant for *STAT6* (NM\_001178079.2) at c.1256A>C, p.D419A was  
72 identified.

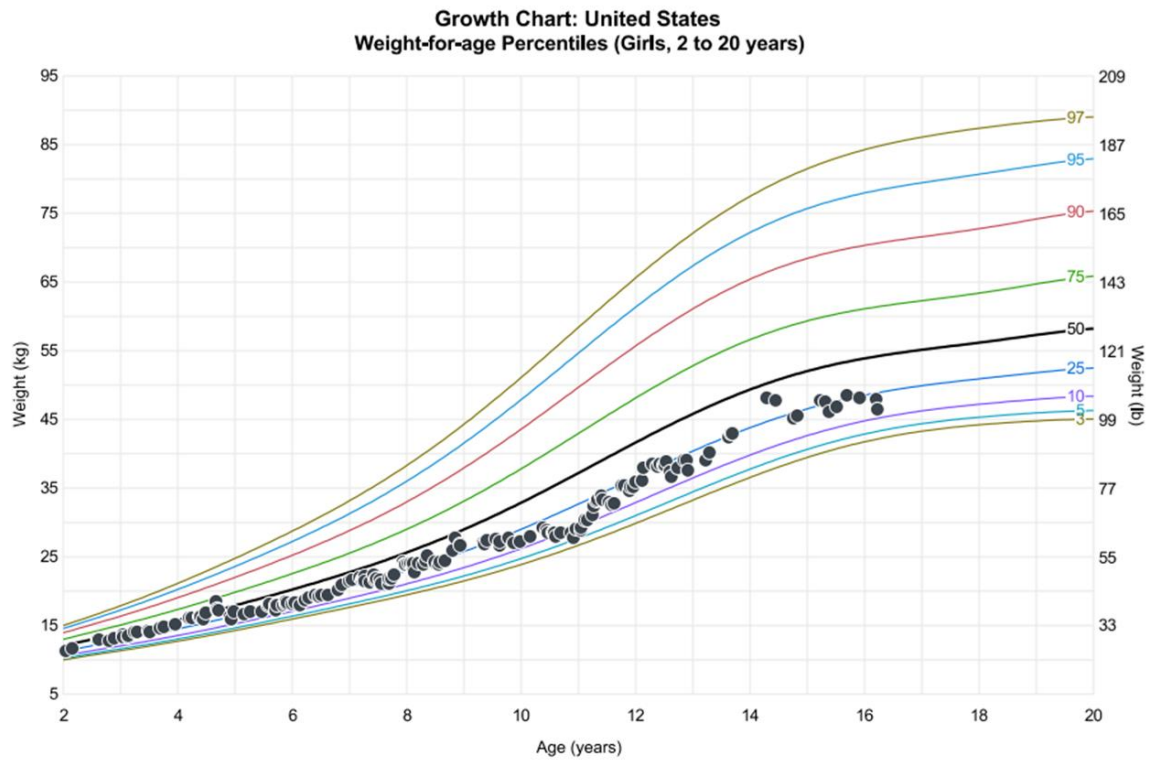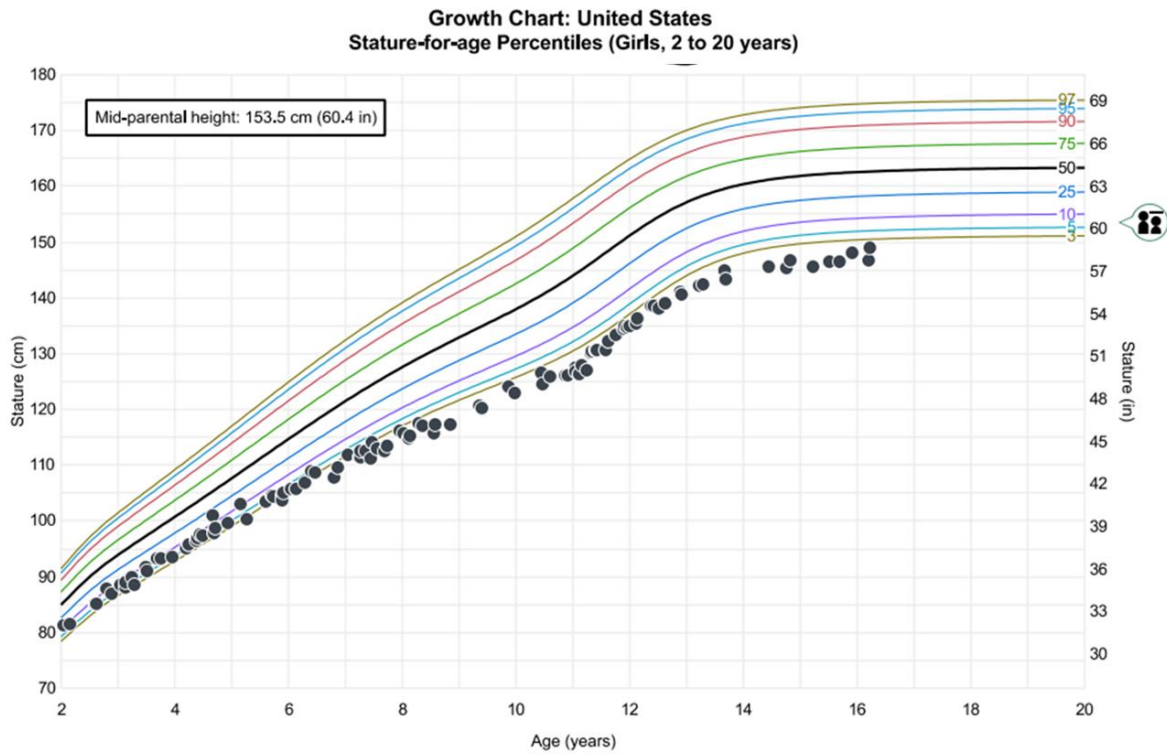

 Mid-parental height

74 **Figure 8:** Height and weight of P2 marked in black dots on United States specific growth charts  
75 for girls aged 2-20 years. Percentiles 3<sup>rd</sup>, 5<sup>th</sup>, 10<sup>th</sup>, 25<sup>th</sup>, 50<sup>th</sup>, 75<sup>th</sup>, 90<sup>th</sup>, 95<sup>th</sup>, 97<sup>th</sup> are shown for  
76 reference.

77

**78 Patient 3**

79 Patient 3 (P3) is a 37-year-old female of Middle Eastern origin who is the mother of Patient 4.  
80 She was born to unrelated parents, and she has six siblings. Neither the parents nor her siblings  
81 suffered with allergic disease. She developed severe atopic dermatitis during childhood. She  
82 was admitted to hospital twice at 2 and 14 years when her skin condition became so severe that  
83 she required inpatient atopic dermatitis management. She had no neurologic or skeletal  
84 features. Currently, she has chronic xerosis, cutaneous itching, and some food allergies. Blood  
85 testing revealed eosinophilia and elevated serum IgE levels.

86

**87 Patient 4**

88 Patient 4 (P4) is a 10-year-old male of Middle Eastern origin who is the son of P3. His parents are  
89 unrelated, and both his father and younger female sibling are healthy with no significant allergic  
90 disease. He presented at 1.5 months of age with moderately severe atopic dermatitis that  
91 persisted throughout childhood. He also presented with low growth velocity that has carried on  
92 throughout his life (**Fig 9**). Furthermore, he developed recurrent upper and lower respiratory  
93 infections (mostly viral) since early infancy. He had no diagnosis of asthma and received no  
94 inhalational therapies. Monthly intravenous immunoglobulin started at age 7 years and  
95 ameliorated respiratory infections. He has clinical IgE-mediated food allergy with episodes of  
96 anaphylaxis occurring after eating peanut and pistachio during the second year of life. Allergen  
97 skin prick test is positive for peanuts, tree nuts, eggs, and fish. Microarray component resolved  
98 diagnosis (CRD) analysis confirmed high specific IgE titers to several food and aeroallergens.  
99 Beginning at age 2 years, he experienced dysphagia and esophageal food impaction. Endoscopy  
100 visualized stenosis of the esophagus and biopsies confirmed the diagnosis of eosinophilic  
101 esophagitis. The six-food elimination diet designed for eosinophilic oesophagitis and swallowed  
102 fluticasone were of limited efficacy. He is currently managed with a combination of oral  
103 prednisolone (unable to wean below 5 mg per day), a proton pump inhibitor and he undergoes  
104 balloon dilatation of the esophagus every month. He is on regular emollient and topical  
105 mometasone to control atopic dermatitis. P4 experiences recurrent oropharyngeal and  
106 esophageal candidiasis which responds to fluconazole therapy. P4 has some skeletal features  
107 including delay in closure of anterior fontanelle until age 3 years, fracture of right ankle bones at  
108 age 4 years, and ectopic eruption of an upper incisor tooth at age 7 years. He has mild coarse  
109 facies and no joint hyperlaxity. Bone densitometry shows no osteopenia. Magnetic resonance

110 imaging (MRI) and angiography (MRA) of the brain are unremarkable. Serial blood testing is  
111 notable for eosinophilia and elevated serum IgE levels. P4 had received tofacitinib (5mg/day) for  
112 2 months at the time this manuscript was finalized. His initial response to tofacitinib was  
113 encouraging with less dysphagia, less esophageal food impaction, and improved endoscopic  
114 appearance of the esophagus.

115 Genetic testing, via WES, revealed a heterozygous variant for STAT6 (NM\_001178079.2) at  
116 location c.1255G>T, p.D419Y in P4, that was maternally inherited from P3.



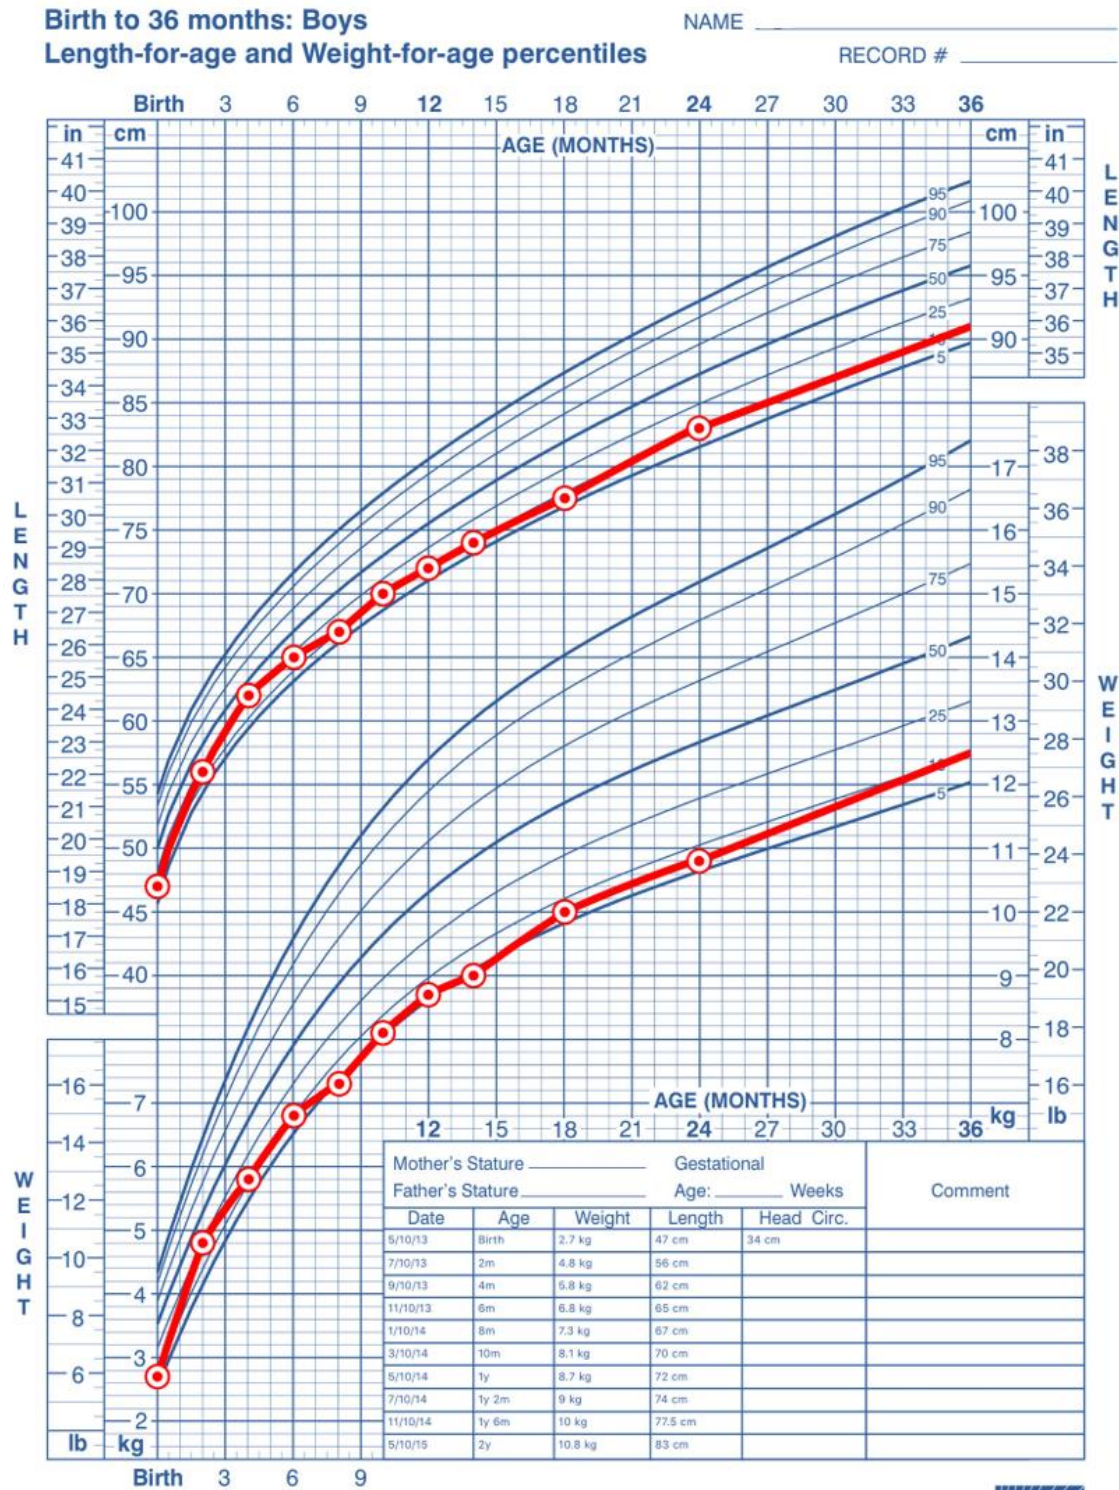

Published May 30, 2000 (modified 4/20/01).  
 SOURCE: Developed by the National Center for Health Statistics in collaboration with the National Center for Chronic Disease Prevention and Health Promotion (2000).  
<http://www.cdc.gov/growthcharts>

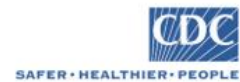

118 **Figure 9:** Height and weight of P4 marked in red circular dots on Center for Disease Control  
119 (CDC, US) specific growth charts for boys from birth to 3 years of age. Percentiles 5<sup>th</sup>, 10<sup>th</sup>, 25<sup>th</sup>,  
120 50<sup>th</sup>, 75<sup>th</sup>, 90<sup>th</sup>, 95<sup>th</sup> are shown for reference.

121

122 **Patient 5**

123 Patient 5 (P5) is a 22-year-old female of European descent born at term after an uneventful  
124 pregnancy to healthy, non-consanguineous parents. She has two younger monozygotic twin  
125 brothers who are healthy without allergic disease. In the first year of life she developed severe  
126 widespread atopic dermatitis refractory to topical therapies and she experienced several  
127 episodes of anaphylactic shock due to multiple food allergies. Her sensitization to food as  
128 confirmed by high levels of specific IgE has grown over time resulting in a very restricted diet.  
129 She has documented IgE sensitization by radioallergosorbent (RAST) test or immuno-solid  
130 phase allergen chip (ISAC) test to many allergens (milk, eggs, shellfish, fish, blueberry, dried  
131 fruits, legumes, soy). She has also experienced allergic reactions to some drugs.

132 As a child she experienced recurrent respiratory infections, including two episodes of bacterial  
133 pneumonia. At the age of 2 years she was diagnosed with severe asthma which persists today  
134 and is managed with a combination of oral antihistamines, inhaled corticosteroids, and inhaled  
135 long-acting beta 2-agonists (LABAs). Asthma flares are managed with courses of oral  
136 corticosteroids and inhaled short-acting beta 2-agonists (SABAs), and recurrent infections are  
137 managed with antibiotics. A chest CT scan, performed at 22 years, showed widespread  
138 bronchiectasis and signs of chronic and recurrent infections/inflammation of the parenchyma.  
139 No invasive fungal infections have ever been detected, but she experienced recurrent vaginal  
140 candidiasis. Chronic low-copies EBV blood replication with complete seroconversion has also  
141 been documented.

142 From the age of 15 years, she experienced irregular bowel habits with abdominal pain,  
143 constipation and diarrhoea. The endoscopic biopsy, performed at the age of 20 years while  
144 under the exclusion diet, showed a non-specific infiltrate with an eosinophilia (3-5 per high  
145 power field (HPF) in the esophageal mucosa and 10-33 per HPF in the large intestine.

146 Addition features include: (a) she presented at the age of 3 years with HPV-negative oral and  
147 laryngeal papillary hyperplasia; (b) she has features of hyperextensible joints; (c) a homozygous  
148 mutation in the *MTHFR* gene was detected, associated with hyperhomocysteinemia that  
149 improved with folic acid therapy; (d) brain MRI performed at the age of 22 years which was  
150 unremarkable; (e) and normal growth velocity over the course of her life (**Fig 10**).

151 Serial blood testing was notable for eosinophilia and persistently elevated serum IgE values.  
152 She was noted to have a reduced frequency of peripheral Th17 cells as well as a reduction

153 overtime of the frequency and absolute values of CD19 B-cells with a normal pattern of B cell  
154 maturation. Next generation sequencing (NGS) panel was nagtive for known IEI genes,  
155 however clinical exome sequencing identified a de novo heterozygous variant in *STAT6*  
156 (NM\_001178079.2) at location c.1255G>A; p.D419N.

**2 to 20 years: Girls**  
**Stature-for-age and Weight-for-age percentiles**

NAME \_\_\_\_\_

RECORD # \_\_\_\_\_

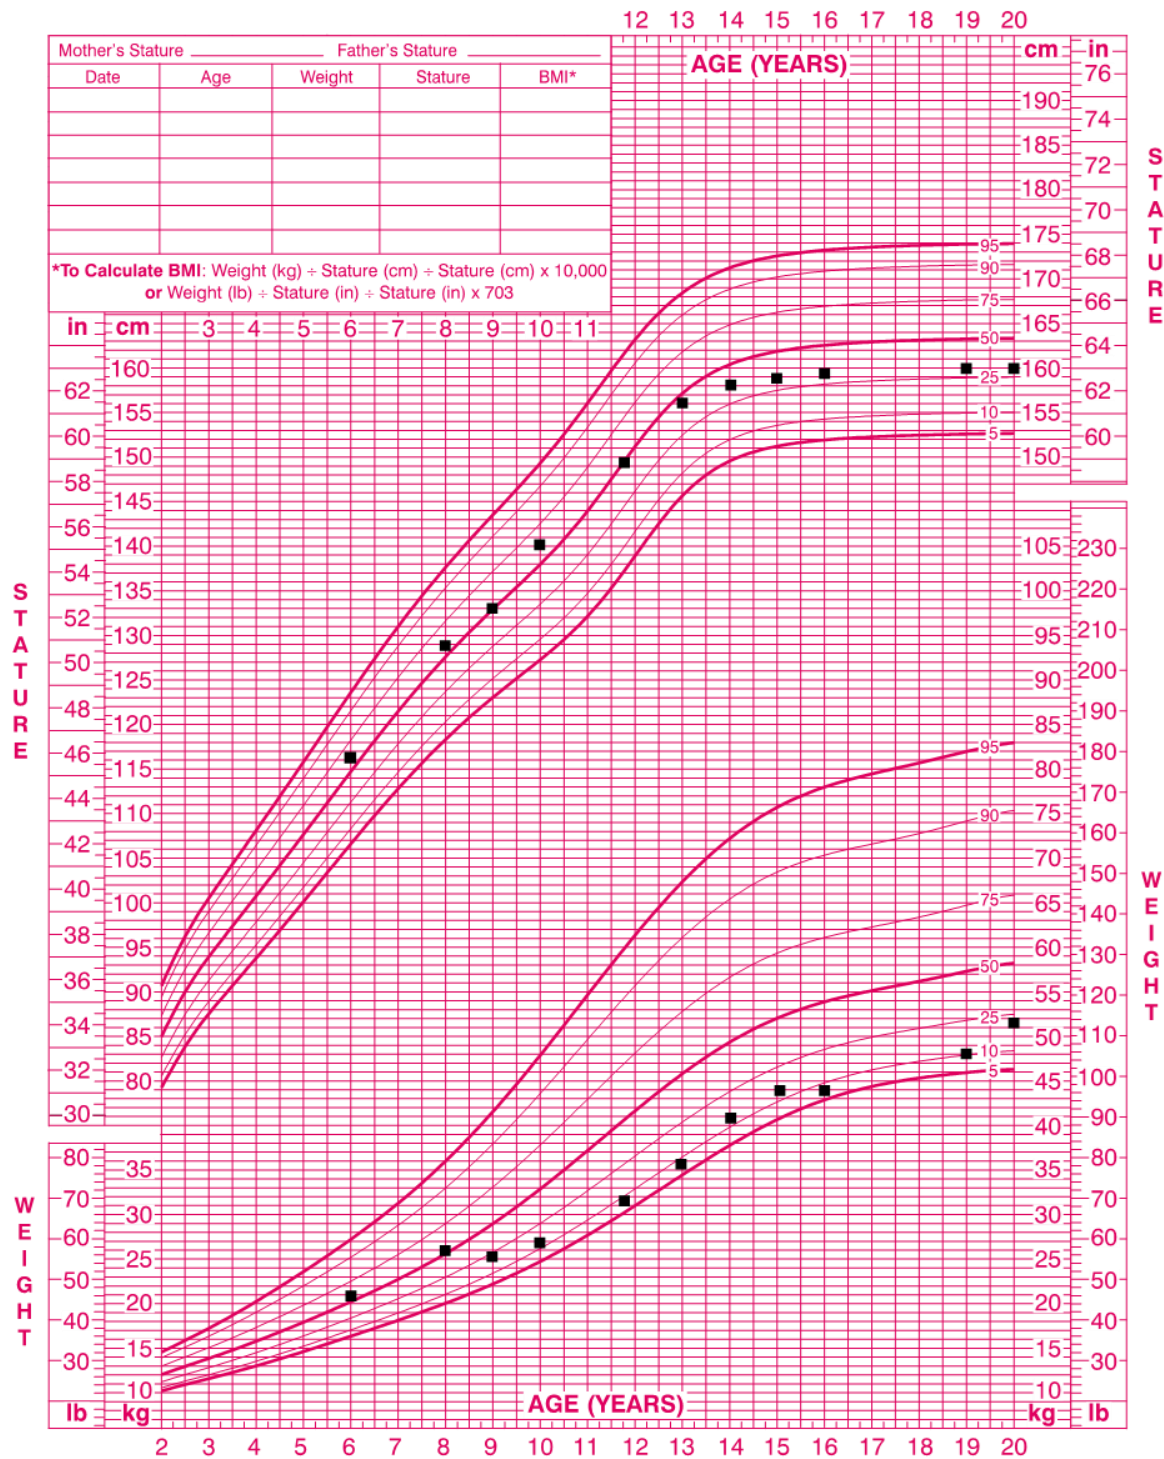

Published May 30, 2000 (modified 11/21/00).  
 SOURCE: Developed by the National Center for Health Statistics in collaboration with  
 the National Center for Chronic Disease Prevention and Health Promotion (2000).  
<http://www.cdc.gov/growthcharts>

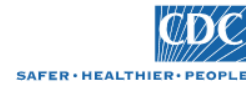

158 **Figure 10:** Height and weight of P5 marked in black squares on CDC specific growth charts for  
159 girls from 2 to 20 years of age. Percentiles 5<sup>th</sup>, 10<sup>th</sup>, 25<sup>th</sup>, 50<sup>th</sup>, 75<sup>th</sup>, 90<sup>th</sup>, 95<sup>th</sup> are shown for  
160 reference.

161

162 **Patient 6**

163 Patient 6 (P6) is a male patient of East Asian descent with severe treatment-resistant atopic  
164 dermatitis, asthma and multiple food allergies since early days of life, and required frequent  
165 hospital admissions for management of severe atopic dermatitis. At the age of 8 years, he had  
166 an episode of bacteremia with pancytopenia due to *Staphylococcus aureus* and group G  
167 *Streptococcus*. Other notable infections include recurrent *S. aureus* cellulitis and *S. aureus*  
168 septic arthritis in hip and knee. At the age of 9 years, he was diagnosed with eosinophilic  
169 gastrointestinal disease with biopsy-proven hyper eosinophilia in stomach and duodenum. This  
170 eosinophilic gastrointestinal disease resulted in protein-losing enteropathy and multiple nutrient  
171 deficiencies. At the age of 14 years, the patient experienced pulmonary hypertension and was  
172 diagnosed with interstitial lung disease during an asthmatic attack accompanied by severe  
173 eosinophilia. The patient has short stature with his height was persistently lower than 3rd  
174 percentile since young childhood until young adulthood accompanied by delayed bone age (**Fig**  
175 **11**). He was started on growth hormone replacement at age of 16 years, but did not alter his  
176 poor growth velocity. Subsequent to the diagnosis of STAT6 gain-of-function disease, he was  
177 started on dupilumab at the age of 19 years, and has enjoyed a dramatic reduction of peripheral  
178 eosinophilia, marked improvement atopic dermatitis activity as quantified by SCORAD and EASI  
179 scores, and most importantly, the sustained absence of disease flare. The patient also  
180 experienced rapid growth after initiating dupilumab treatment, with close to 20cm height gain  
181 and 30kg weight gain in the 2 years after his first dose of dupilumab. Given the severity of the  
182 disease presentation, WES was conducted and a *de novo* heterozygous variant at c.1256A>G,  
183 p.D419G for *STAT6* (NM\_001178079.2) was identified.

### Height-for-age Percentiles: Boys, birth to 24 years

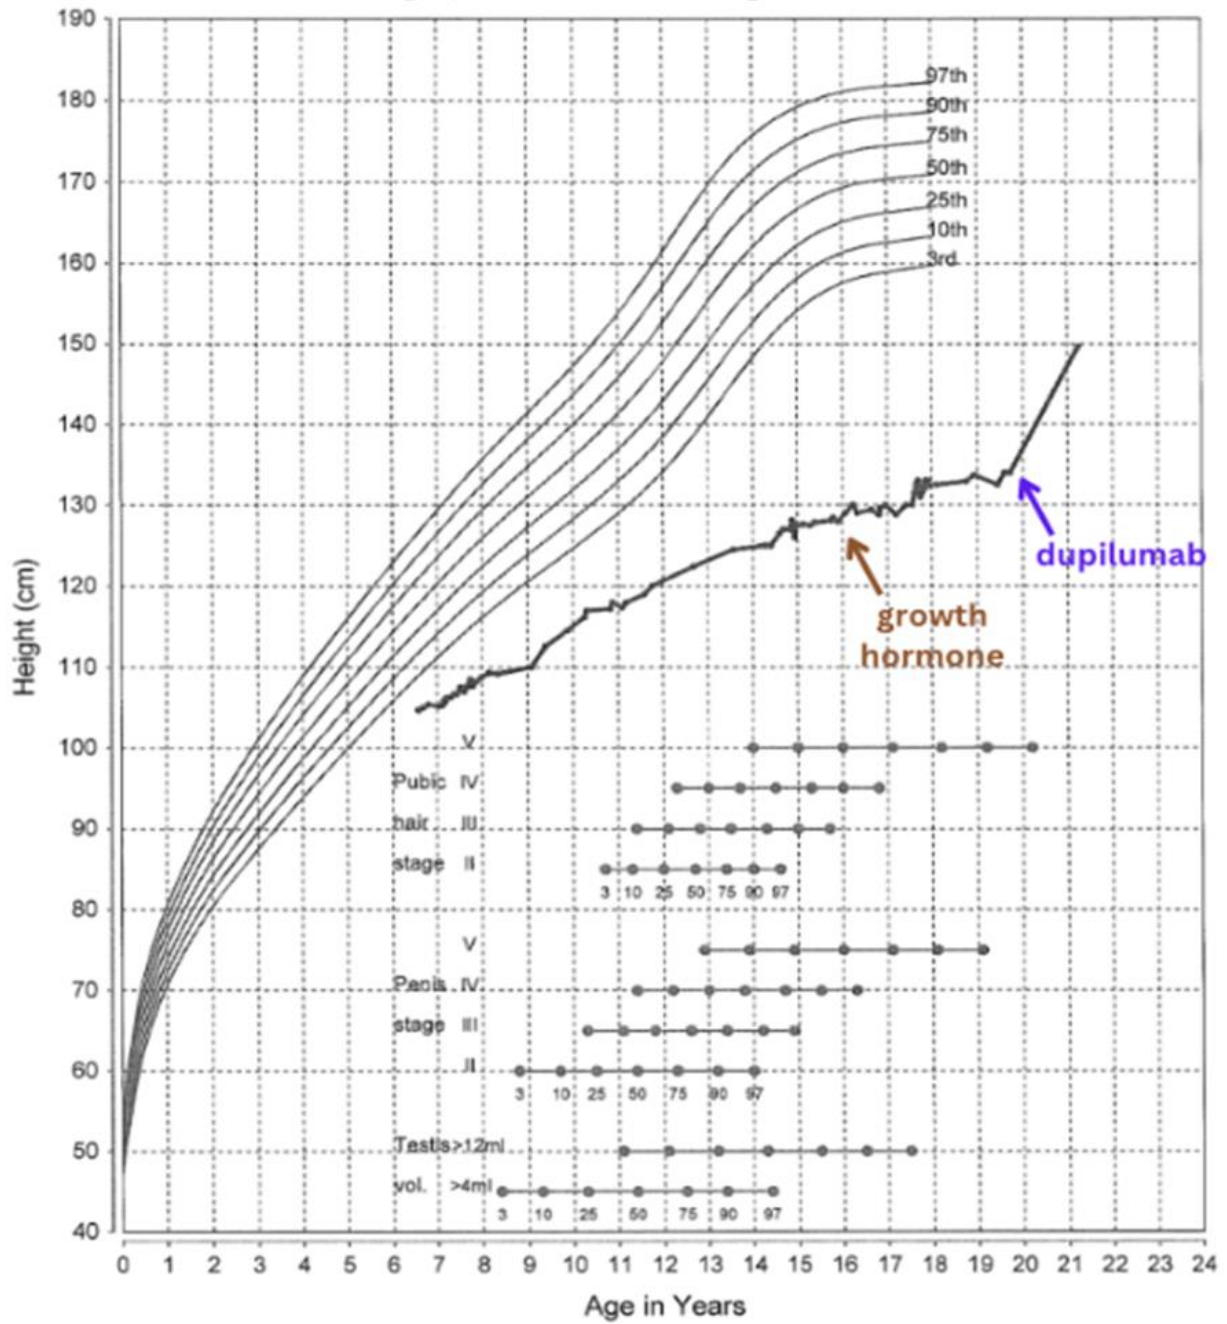



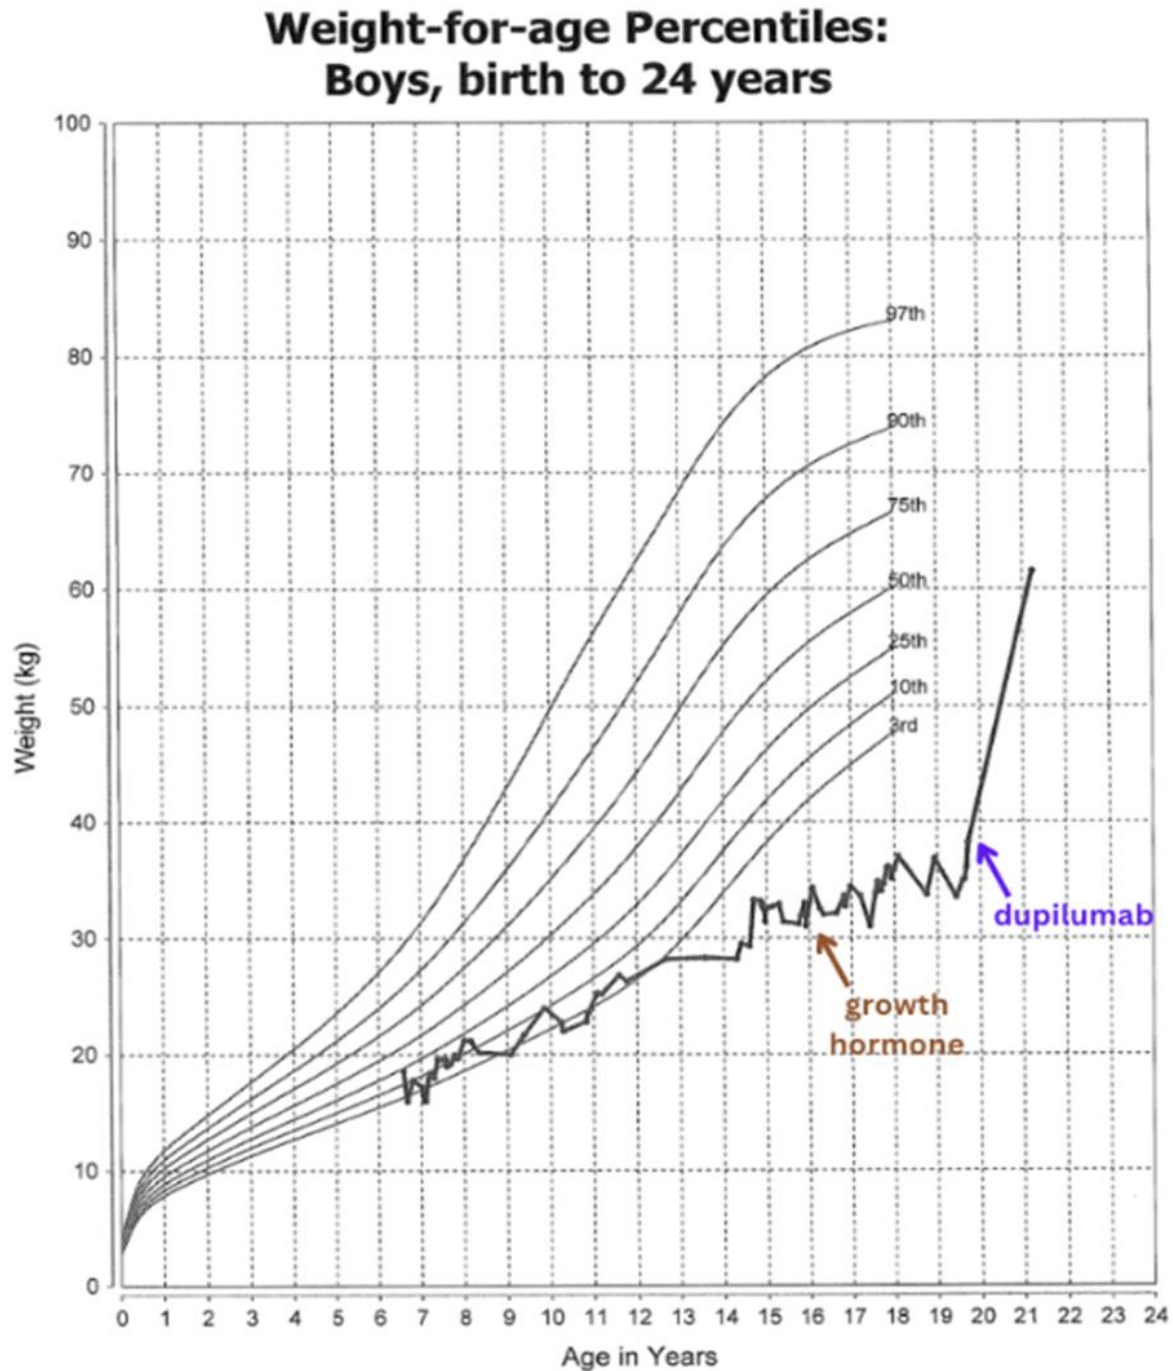

185

186 **Figure 11:** Height and weight growth charts for P6 (black line) in reference to the 3<sup>rd</sup>, 10<sup>th</sup>, 25<sup>th</sup>,  
 187 50<sup>th</sup>, 75<sup>th</sup>, 90<sup>th</sup>, 97<sup>th</sup> percentile of the Hong Kong population for boys from birth to 24 years of  
 188 age. Initiation of growth hormone treatment and Dupilumab treatment are shown on the graphs.

189

190 **Patients 7-9** are part of a family that are also described in the following preprint: “Autosomal  
191 dominant STAT6 gain of function causes severe atopy associated with lymphoma”  
192 (<https://doi.org/10.21203/rs.3.rs-2116300/v1>).

193

#### 194 **Patient 7**

195 Patient 7 (P7) is a 60 year old female of European descent presented in early childhood with  
196 severe atopic dermatitis, multiple food allergies, and frequent asthma exacerbations as a child.  
197 She was also found to have high serum IgE levels and clinical food allergies to nuts, shellfish,  
198 and cow's milk. Her asthma and atopic dermatitis symptoms ameliorated throughout  
199 adolescence, although she continues to have allergic symptoms, which are managed with a  
200 combination of inhaled and topical steroids. She was diagnosed with eosinophilic esophagitis at  
201 age 26 years which was responsive to topical steroid therapy. She is the mother of 3 children,  
202 two of whom had severe allergic disease (Patients 8 and 9). At age 49 years she was  
203 diagnosed with follicular lymphoma at following presentation with bilateral axillary  
204 lymphadenopathy. She subsequently relapsed with diffuse large B cell lymphoma (DLBCL) at  
205 age 60 years and is currently receiving standard chemotherapy protocols.

#### 206 **Patient 8**

207 Patient 8 (P8) is a 42 year old male and son of P7. He presented in his first month of life with  
208 severe widespread atopic dermatitis, and recurrent pneumonia at ages 6 and 12 months. At this  
209 age he had a serum IgE >5000 kU/L (over detection limit at the time). In his second year of life,  
210 he developed food to multiple allergens including: cow's milk, soy, and most tree nuts. Later in  
211 childhood is developed more food allergies to include chicken, sesame, cod, salmon, and tuna.  
212 He has had 4 episodes of anaphylaxis requiring resuscitation, all thought to be due to accidental  
213 exposure to food allergens. He was diagnosed with asthma at age 4 years and had frequent  
214 exacerbations throughout childhood, requiring multiple hospital admissions for treatment with  
215 nebulised and intravenous bronchodilators. He has seasonal allergic rhinoconjunctivitis with  
216 documented IgE-mediated sensitisation to grass and tree pollen. He was diagnosed with  
217 eosinophilic esophagitis at 36 years of age after presenting with dysphagia and was treated with  
218 oral budesonide. Currently at 42 years old, his eczema and asthma symptoms are stable. He is  
219 treated with inhaled steroids and topical emollients and requires occasional topical steroid use.

220 **Patient 9**

221 Patient 9 (P9) is the son of P7 and younger brother of P8. P9 died of anaphylaxis at age 20  
222 years. Details are limited, but by family report, P9 had severe atopic disease manifestations  
223 from early childhood including atopic dermatitis, asthma with frequent exacerbations, and  
224 multiple food allergies including to cow's milk, nuts, soy, and shellfish. He died of anaphylaxis at  
225 age 20 years following ingestion of the non-steroidal anti-inflammatory drug ibuprofen.

226 Next generation sequencing identified a heterozygous *STAT6* (NM\_001178079.2) at location  
227 c.1255G>C, p.D419H variant for P9 and P8 that was maternally from P7.

228

229 **Patient 10**

230 Patient 10 (P10) was a male patient who had life-long severe allergic disease and short stature  
231 (**Fig 12**). The patient was not dysmorphic and was born to unrelated parents. Family history was  
232 notable, with the mother having experienced mild allergies, eczema, and asthma, and the father  
233 had eczema. There is no family history of consanguinity. From 2 months of age, P10 developed  
234 widespread, treatment-resistant atopic dermatitis (eczema), gastroesophageal reflux with  
235 episodes of aspiration pneumonia, as well as chronic diarrhea. He underwent Nissen  
236 fundoplication at age 6 months (with a surgical revision at age 6 years) and gastrostomy feeding  
237 was commenced at age 15 months. Over time, he was also diagnosed with multiple food and  
238 drug allergies with anaphylactic reactions (combined with positive skin prick testing or RAST  
239 testing) documented in response to peanuts, cows milk protein, bananas, sesame seeds, fish,  
240 and eggs. He was fed with extensively hydrolyzed and elemental formulas via gastrostomy with  
241 very limited oral feeding for much of his life. He was also diagnosed with asthma. He  
242 experienced episodes of secondary bacterial skin infections from which *Staphylococcus aureus*,  
243 group A streptococci and *Candida* spp. were isolated. Widespread *molluscum contagiosum* was  
244 another notable skin finding. In his second and third decade of life, he had persisting eczema,  
245 asthma, and perennial rhinitis which worsened during pollen seasons. Repeated upper GI  
246 endoscopies confirmed the diagnosis of eosinophilic esophagitis. During this time, most of his  
247 feeding consisted of elemental formula via gastrostomy supplemented with limited oral intake  
248 (mainly rice, potatoes, and chicken). He was treated with oral steroids for many years and  
249 experienced symptom flares whenever the dose of prednisone was dropped below 10mg/day.  
250 He developed side-effects related to corticosteroids including cataracts, osteoporosis, and  
251 pathogenic fractures. He had an episode of thromboembolic ischemia of the right first and third  
252 toes with pain and cyanosis, ultimately requiring a lumbar sympathectomy to relieve the pain. At  
253 age 35 years, he was hospitalized for non-bloody diarrhea, profound weight loss, malnutrition,  
254 weakness, and vertigo. He was treated with high dose of prednisone, antibiotics, and elemental  
255 feeding. During the hospitalization, he died after developing a spontaneous subarachnoid  
256 hemorrhage with obstructive hydrocephalus, presumed secondary to an aneurysm. Blood  
257 testing over the years confirmed eosinophilia and high serum IgE levels. At age 20 years,  
258 lymphocyte phenotyping and proliferation to a panel of mitogens were unremarkable. An initial  
259 genetic assessment revealed normal sequences for STAT3 and DOCK8, prompting a more  
260 extensive genetic evaluation by whole exome sequencing (WES). Subsequently, *de novo*  
261 heterozygous variant for *STAT6* (NM\_001178079.2) at c.1144G>C, p.E382Q was identified.



263 **Figure 12:** Height and weight of P10 marked in red dots on a WHO adapted growth charts for  
264 Canada using the 3<sup>rd</sup>, 15<sup>th</sup>, 50<sup>th</sup>, 85<sup>th</sup>, and 97<sup>th</sup> percentiles for boys aged 2-19 years.

265

266 **Patient 11**

267 Patient 11 (P11) is a 8-year-old male patient with severe atopic dermatitis beginning in early  
268 childhood complicated by recurrent bacterial skin infections as well as single episode invasive  
269 fungal skin infection. He is of South Asian descent with family history notable for a mother with  
270 mild atopic dermatitis and a maternal aunt with allergic rhinitis. He had a history of an infantile  
271 skin eruption beginning at four months of age. At age 6 years he was referred to a major  
272 pediatric academic center for treatment failure, and he was further escalated to a national  
273 referral center at age 8 years for treatment resistant atopic dermatitis. When reviewed at age 8  
274 years, his atopic dermatitis remained severe (SCORAD=57) despite intense therapy with high  
275 potency topical corticosteroids and topical tacrolimus. When assessed at 8 years, in addition to  
276 his severe atopic dermatitis, notable findings were short stature (**Fig 13**) and laboratory  
277 evaluation revealing eosinophilia and elevated serum IgE levels. He was treated with multiple  
278 modalities including topical and oral corticosteroids, oral anti-fungal, topical and oral antibiotics  
279 and topical calcineurin inhibitors. He experienced cutaneous infections with fungal  
280 superinfection at age six years prompting treatment with oral griseofulvin, and an episode of  
281 bacterial superinfection at age six years treated with oral cephalexin Additional allergic features  
282 included allergic rhinitis with skin prick testing positive for dust mites possible drug allergy with  
283 urticaria following neomycin, bacitracin, and polymyxin ointment. WES was conducted and a de  
284 novo heterozygous variant for *STAT6* (NM\_001178079.2) at c.1784A>G, p.K595R was  
285 identified.





287 **Figure 13:** Height and weight of P11 marked in red dots on CDC specific growth charts for boys  
288 from 2 to 20 years of age. Percentiles 3<sup>rd</sup>, 10<sup>th</sup>, 25<sup>th</sup>, 50<sup>th</sup>, 75<sup>th</sup>, 90<sup>th</sup>, 97<sup>th</sup> are shown for reference.

289

290 **Patient 12**

291 Patient 12 (P12) is a 5-year-old female of South East Asian descent with very early-onset  
292 uncontrolled asthma. The patient was born to healthy non-consanguineous parents and she has  
293 one healthy older sister. Within the first month of life she was noted to have dyspnea and was  
294 admitted to a local hospital for 2 weeks and was suspected to have pneumonia, yet  
295 microbiology workup was negative. Throughout the first year of life, the patient was admitted  
296 almost monthly for similar episodes of wheezing and dyspnea, occasionally with fever, with  
297 negative comprehensive microbiology work-up every time. She first required mechanical  
298 ventilation for her condition at 3 months old. She was diagnosed to have asthma and was  
299 treated with a combination of intermittent oral corticosteroids plus inhaled corticosteroids and  
300 inhaled bronchodilators. Until the age of 5 years, she has been hospitalized frequently requiring  
301 intubation and mechanical ventilation 13 times for asthma attacks. Extensive imaging ruled out  
302 a structural airway abnormality. Growth chart for P12 also shows short stature (**Fig 14**).  
303 Investigations revealed persistent eosinophilia and high IgE levels in blood. Trio WES of P12  
304 and the two parents identified a *de novo* STAT6 (NM\_001178079.2) variant at c.1928C>G,  
305 p.P643R was identified.

## Height-for-age GIRLS

2 to 5 years (percentiles)

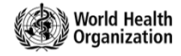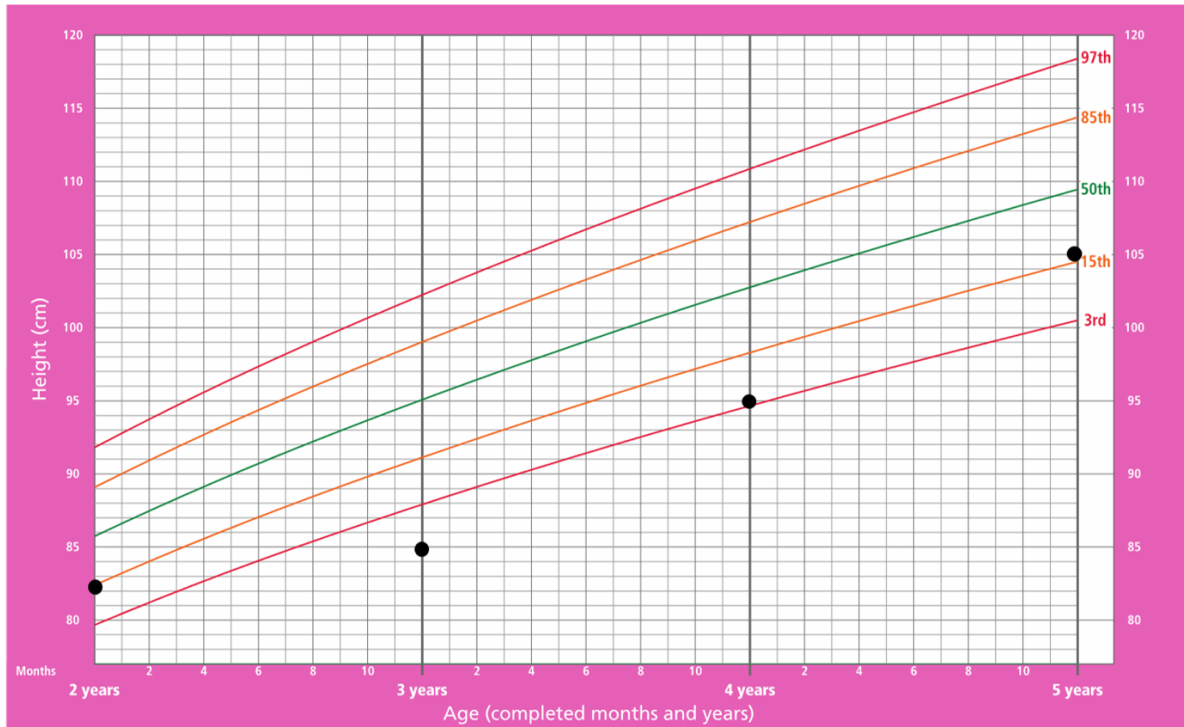

WHO Child Growth Standards

## Weight-for-age GIRLS

2 to 5 years (percentiles)

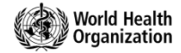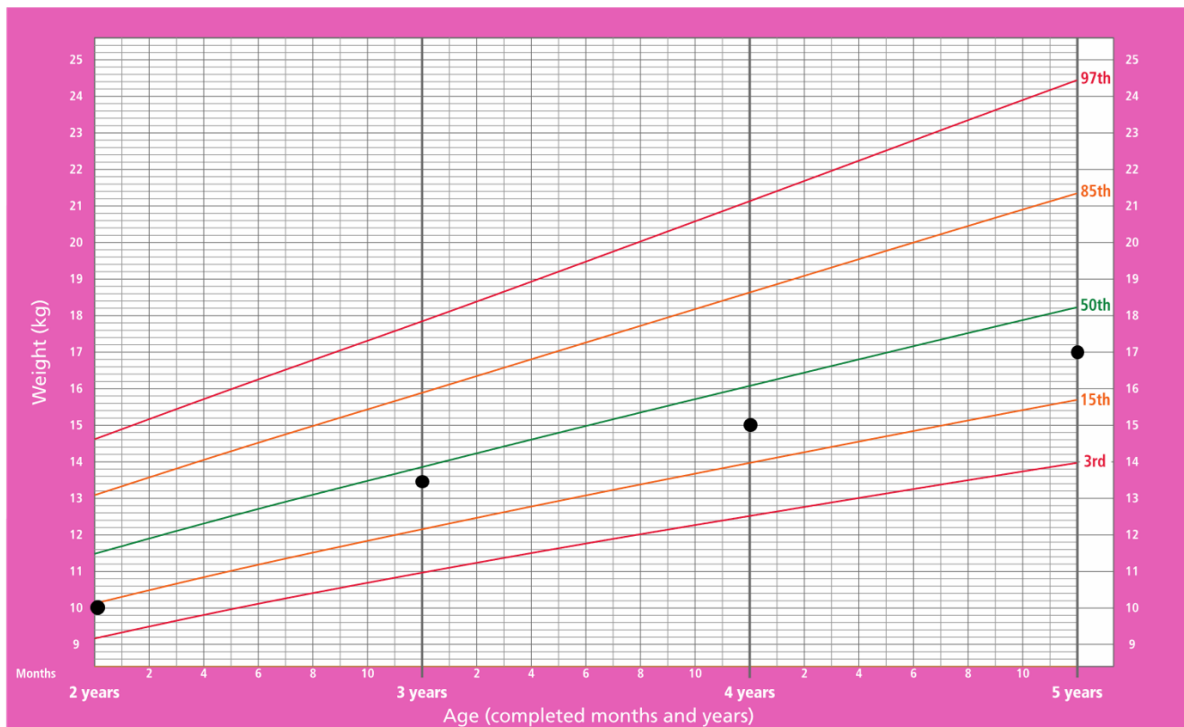

WHO Child Growth Standards

307 **Figure 14:** Height and weight of P12 marked in black dots on a WHO Child Growth charts using  
308 the 3<sup>rd</sup>, 15<sup>th</sup>, 50<sup>th</sup>, 85<sup>th</sup>, and 97<sup>th</sup> percentiles for girls aged 2-5 years.

309

310 **Patient 13**

311 Patient 13 (P13) is a 34-year-old female, born to non-consanguineous parents of Caucasian  
312 descent. Family history is notable for the fact that her father was reported to have suffered with  
313 severe atopic dermatitis, food allergies, and eczema although available details are limited. P13  
314 is the mother of four children, three of whom have severe allergic disease (P14, P15 and P16  
315 described below). From very early in childhood, she developed multiple IgE-mediated food  
316 allergies, asthma, and severe atopic dermatitis. She has documented food allergies to cow's  
317 milk, tuna, kiwi, tomato, egg, tree nuts and several stone fruits managed by life-long strict  
318 avoidance. Accidental exposures triggered anaphylactic reactions during childhood and again at  
319 age 34 years. Her atopic dermatitis flared around age 32 years requiring increased intensity  
320 therapy including PUVA (psoralen and UVA) treatment. At the age of 34 years she presented  
321 with a skin abscess which had been present for at least one year. The abscess was drained and  
322 the culture grew *Fingoldia magna*, a gram-positive anaerobic coccus, which responded to oral  
323 clindamycin. Serial blood testing revealed eosinophilia and a high total serum IgE level  
324 throughout her life. Next generation sequencing, mendeliome sequencing, was conducted on  
325 P13 and her four children and heterozygous variants at c.1555G>C, p.D519H in STAT6  
326 (NM\_001178079.2) were identified in the diseased individuals.

327

328 **Patient 14**

329 Patient 14 (P14), a 9-year-old male, is the second child born to a non-consanguineous couple of  
330 Caucasian descent. He was born term following a normal pregnancy and displayed no  
331 dysmorphic features. P14 has had low weight and height that has been 1 standard deviation  
332 below the average his entire life (**Fig 15**). His father died at age 27 years of septic shock with  
333 necrotizing pneumonia caused by influenza with secondary *Streptococcus pneumoniae*  
334 infection. Since the age of one month, he suffered from severe chronic atopic dermatitis. Over  
335 time, he was diagnosed with multiple IgE mediated food allergies (confirmed with positive skin  
336 prick testing or specific IgE (RAST) tests) including egg, wheat, gluten, rice, cow's milk, potato,  
337 peanut, tree nuts, codfish, stonefruit, corn, beef and chicken meat, kiwi, banana and celeriac.  
338 Upon exposure to these allergens, the patient's eczema flared and he experienced several  
339 anaphylactic reactions. Extensive dietary restrictions were required consisting of elemental  
340 formulas with very limited oral feeding that is still ongoing. He was diagnosed with eosinophilic  
341 esophagitis at the age of 3 years, which was treated oral viscous corticosteroids. Although  
342 initially responsive to oral corticosteroids, at age 6 years he was diagnosed with more extensive  
343 eosinophil gastrointestinal disease with eosinophilic gastritis and duodenitis requiring high dose  
344 systemic corticosteroids and nasogastric tube feeding with elemental formulas. In the ensuing  
345 years, eosinophilic intestinal disease activity frequently flared whenever his diet was expanded  
346 and complete control was never achieved despite treatment with systemic corticosteroids and  
347 high dose proton pump inhibitors. The patient was diagnosed with asthma at age 1 year and  
348 was treated with inhaled corticosteroids and bronchodilators. He was confirmed to have IgE-  
349 mediated sensitization to inhalant allergens including house dust mite, grass and tree pollen. He  
350 experienced several acute asthma exacerbations, often triggered by viral upper respiratory tract  
351 infections. The severity of the eosinophilic asthma and gastrointestinal disease prompted the  
352 initiation of treatment with mepolizumab (anti-interleukin-5 monoclonal antibody) at age 7yrs.  
353 Notably, hospitalization and systemic corticosteroid treatment was necessary on eight different  
354 occasions through his life, three of which were after the initiation of treatment with mepolizumab.  
355 At the age of 9 years and nine months, B-cell lymphopenia and hypogammaglobulinemia were  
356 identified and intravenous immunoglobulin replacement therapy was started. Serial blood testing  
357 revealed eosinophilia and a high total serum IgE level.

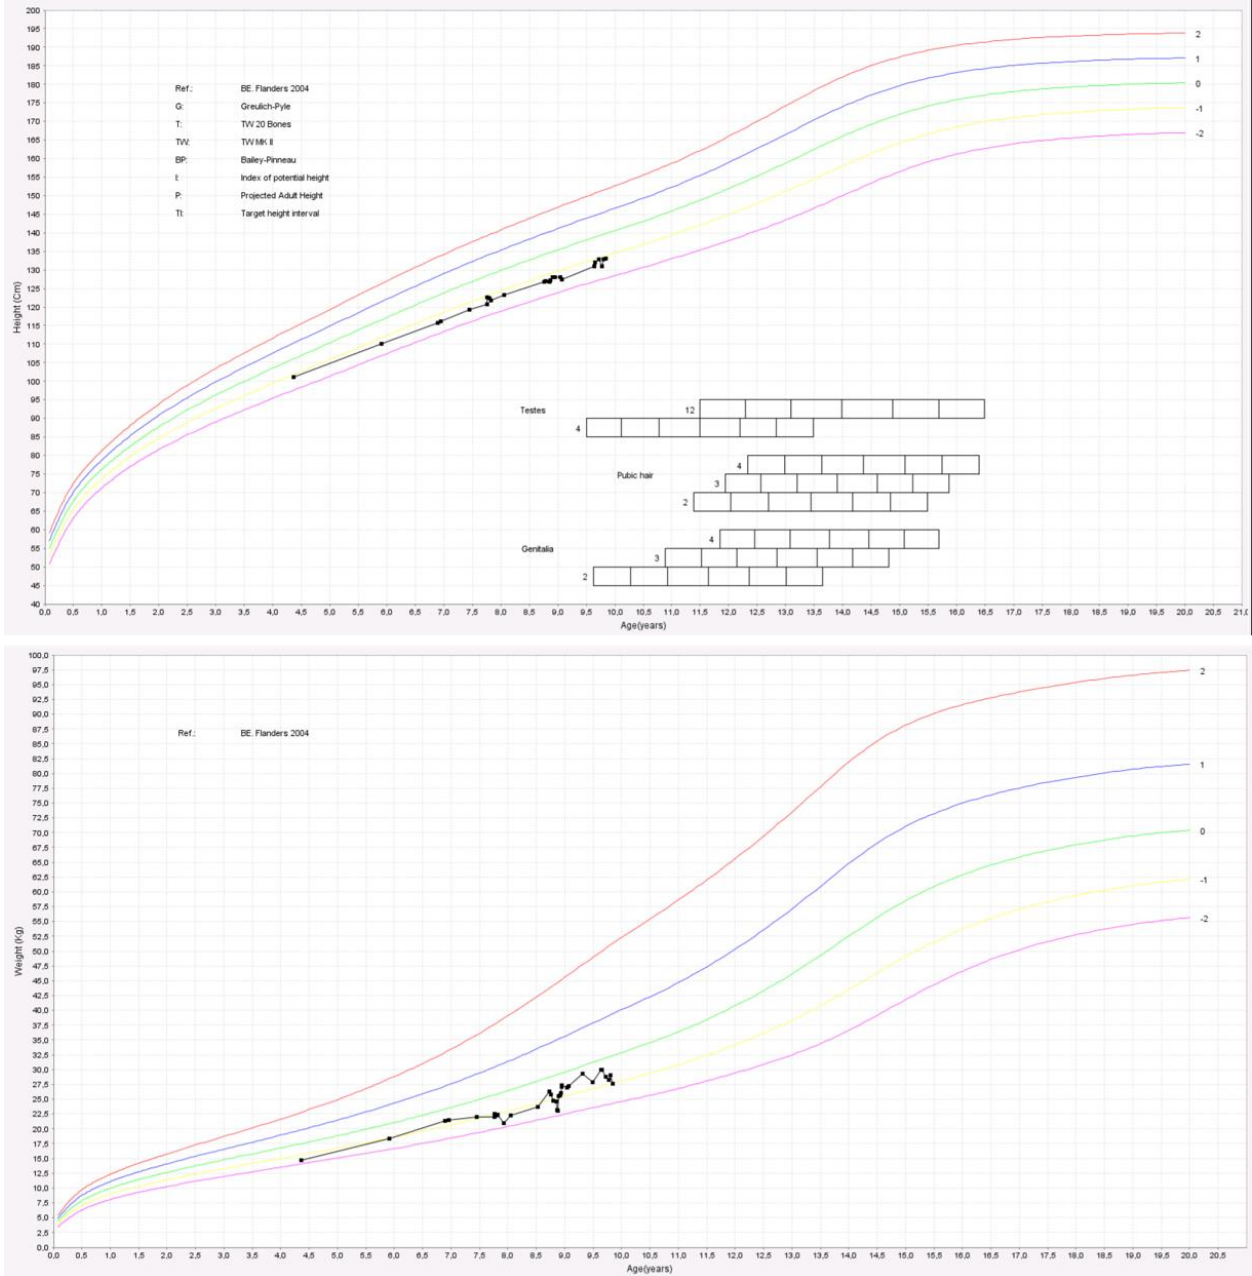

358

359 **Figure 15:** Height and weight growth charts for P14 (black lines) in reference to +/- 1 and +/- 2  
360 standard deviation of the Flemish population of boys from birth to the age of 20 years.

361

362 **Patient 15**

363 Patient 15 (P15), an 8-year-old male, is the younger brother of P14. The patient was born term  
364 following a normal pregnancy and displayed no dysmorphic features. He has had normal weight  
365 and height trajectories (**Fig 16**). Analogous to his older brother, he presented with life-long  
366 severe atopic dermatitis. He was diagnosed with multiple, IgE mediated food allergies to egg,  
367 apple, wheat, soy, tomato, paprika, peanut and tree nuts. These allergies were confirmed with  
368 positive skin prick testing or specific IgE (RAST) tests. He experienced two anaphylactic  
369 reactions after eating chicken meat. The patient's diet was restricted to elemental formulas via  
370 nasogastric feeding with very limited oral feeding. At the age of 4 years he was diagnosed with  
371 eosinophilic esophagitis. He has subsequently suffered with relapsing eosinophilic oesophagitis,  
372 despite treatment with intense therapy with a combination of dietary restrictions, systemic and  
373 topical corticosteroids, and high dose high dose proton pump inhibitors. Serial blood testing  
374 revealed eosinophilia and a marked elevation of the serum total IgE level. B-cell lymphopenia  
375 and hypogammaglobinemia were detected at the age of 8 years and intravenous  
376 immunoglobulin replacement therapy was started.



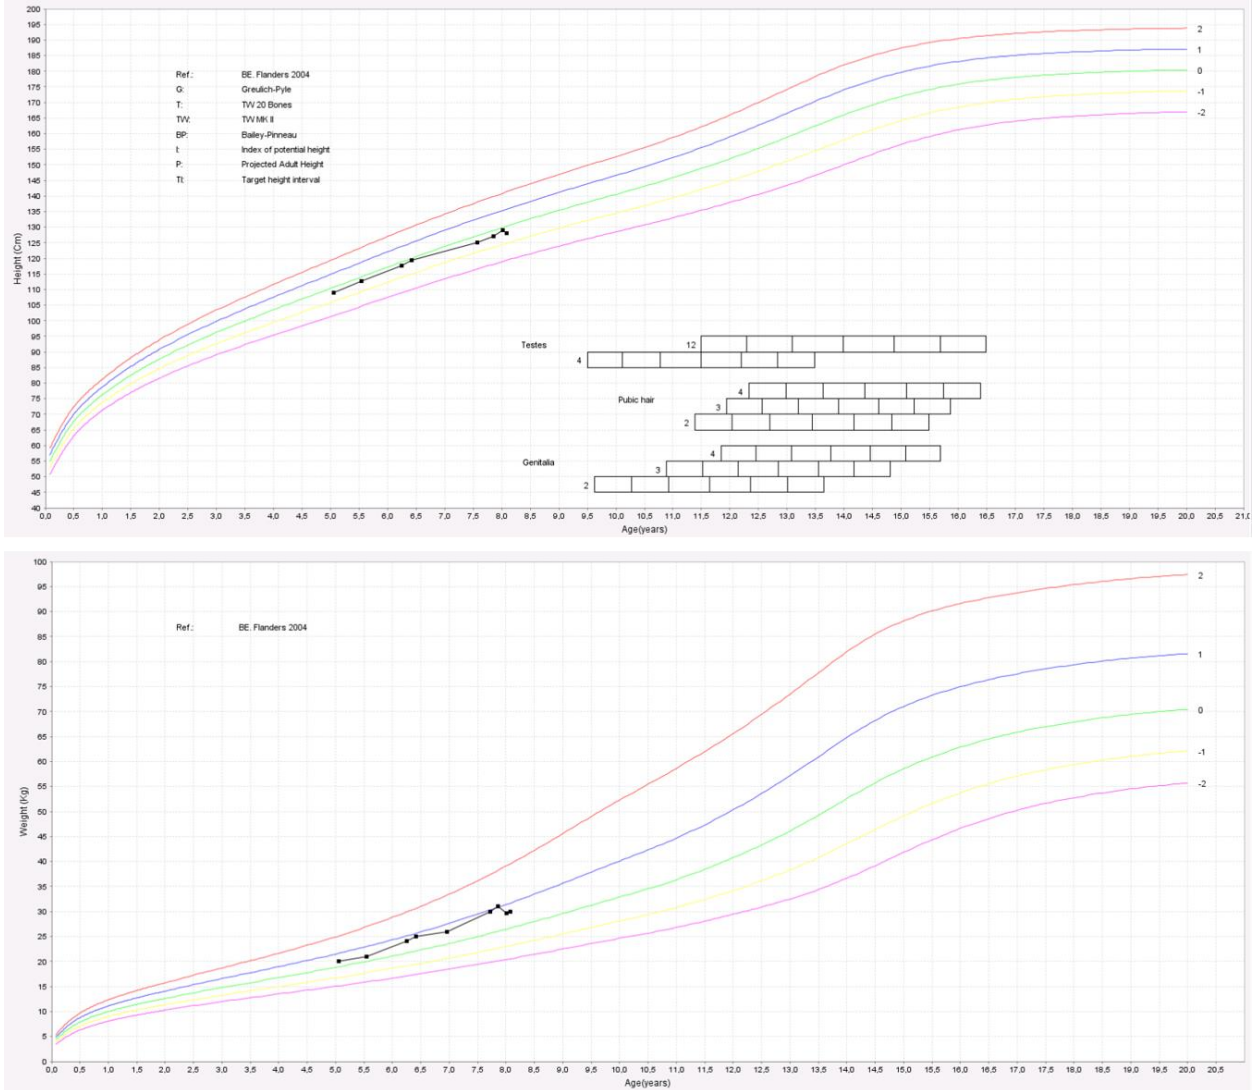

377

378 **Figure 16:** Height and weight growth charts for P15 (black lines) in reference to +/- 1 and +/- 2  
 379 standard deviation of the Flemish population of boys from birth to the age of 20 years.

380

381 **Patient 16**

382 Patient 16 (P16), a four-year-old female, is the younger sibling of P14 and P15. She was born  
383 term following a normal pregnancy and displayed no dysmorphic features. She also has a  
384 growth chart consistent with normal developmental trajectory (**Fig 17**). During the first year of  
385 her life, she developed severe atopic dermatitis, obstructive lung disease and multiple, IgE  
386 mediated food allergies. Skin prick testing and specific IgE (RAST) tests revealed sensitization  
387 to cow's milk, egg, potato, tree nuts, broccoli and cauliflower. Her diet was restricted to  
388 elemental formulas with limited oral feeding. At the age of two years she developed a first  
389 episode of eosinophilic oesophagitis. This was aggressively treated with high dose high dose  
390 proton pump inhibitors, systemic, and later oral viscous corticosteroids and the implementation  
391 of a six-food elimination diet designed for eosinophilic oesophagitis. Nevertheless, she  
392 experienced a flare of eosinophilic oesophagitis at the age of 4 years. She was also diagnosed  
393 with asthma at age 1 year requiring a 5-day hospitalization. Serial blood testing revealed  
394 eosinophilia and a high total serum IgE level. At the age of 4 years, her IgG level was  
395 considered at the lower border of the age-adjusted reference values while her B-cell count was  
396 normal.

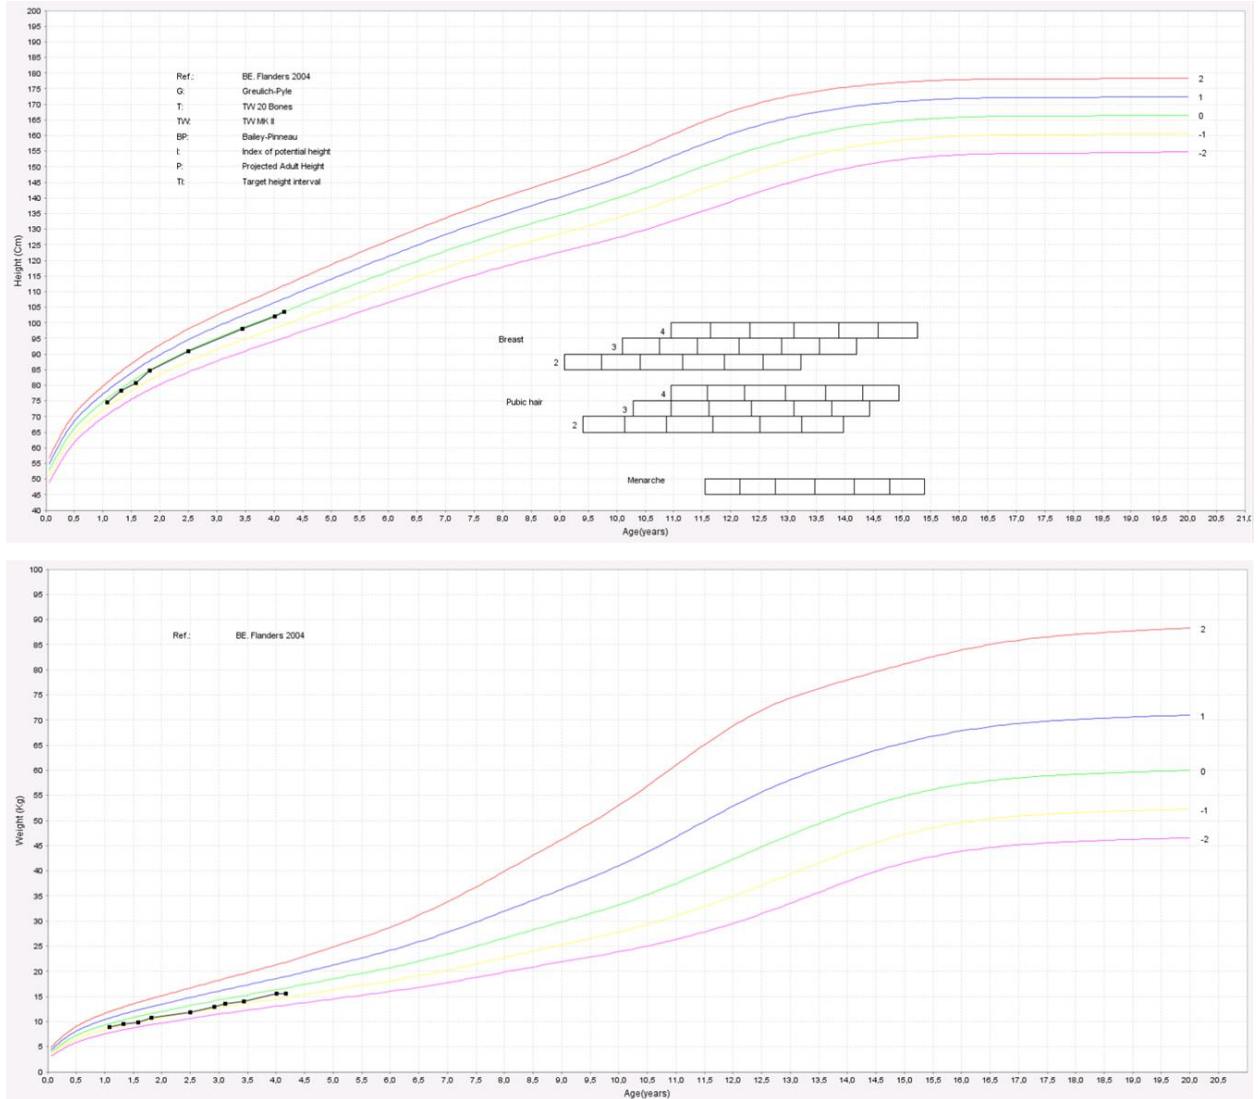

397

398 **Figure 17:** Height and weight growth charts for P16 (black lines) in reference to +/- 1 and +/- 2  
399 standard deviation of the Flemish population of girls from birth to the age of 20 years.
